# Supplementary material for: Network Bioinformatics Analysis Provides Insight into Drug Repurposing for COVID-2019
Source: Preprints.org preprint supplement (doi:10.20944/preprints202003.0286.v1), 2020-03-18
Supplement: Supplementary file 1 [file Supp_table_1_2019-nCoV_autoseed_34_seed_genes.xlsx]

## Sheet: Suupl_table_3_2019nCoV_autoseed
Symbol	type	description	summary_entrez	summary_uniport
ACE2	Protein Coding	Angiotensin I Converting Enzyme 2	Entrez Gene Summary for ACE2 Gene The protein encoded by this gene belongs to the angiotensin-converting enzyme family of dipeptidyl carboxydipeptidases and has considerable homology to human angiotensin 1 converting enzyme. This secreted protein catalyze	UniProtKB/Swiss-Prot for ACE2 GeneACE2_HUMAN,Q9BYF1Carboxypeptidase which converts angiotensin I to angiotensin 1-9, a peptide of unknown function, and angiotensin II to angiotensin 1-7, a vasodilator. Also able to hydrolyze apelin-13 and dynorphin-13 wit
CLEC4M	Protein Coding	C-Type Lectin Domain Family 4 Member M	Entrez Gene Summary for CLEC4M Gene This gene encodes a transmembrane receptor and is often referred to as L-SIGN because of its expression in the endothelial cells of the lymph nodes and liver. The encoded protein is involved in the innate immune system	UniProtKB/Swiss-Prot for CLEC4M GeneCLC4M_HUMAN,Q9H2X3Probable pathogen-recognition receptor involved in peripheral immune surveillance in liver. May mediate the endocytosis of pathogens which are subsequently degraded in lysosomal compartments. Is a rece
SH2D3A	Protein Coding	SH2 Domain Containing 3A	Additional gene information for SH2D3A Gene HGNC(16885)Entrez Gene(10045)Ensembl(ENSG00000125731)OMIM(604721)UniProtKB(Q9BRG2) Search for SH2D3A at DataMedSearch for SH2D3A at HumanCyc	UniProtKB/Swiss-Prot for SH2D3A GeneSH23A_HUMAN,Q9BRG2May play a role in JNK activation.
CXCL10	Protein Coding	C-X-C Motif Chemokine Ligand 10	Entrez Gene Summary for CXCL10 Gene This antimicrobial gene encodes a chemokine of the CXC subfamily and ligand for the receptor CXCR3. Binding of this protein to CXCR3 results in pleiotropic effects, including stimulation of monocytes, natural killer and	UniProtKB/Swiss-Prot for CXCL10 GeneCXL10_HUMAN,P02778Chemotactic for monocytes and T-lymphocytes. Binds to CXCR3.
IRF3	Protein Coding	Interferon Regulatory Factor 3	Entrez Gene Summary for IRF3 Gene This gene encodes a member of the interferon regulatory transcription factor (IRF) family. The encoded protein is found in an inactive cytoplasmic form that upon serine/threonine phosphorylation forms a complex with CREBB	UniProtKB/Swiss-Prot for IRF3 GeneIRF3_HUMAN,Q14653Key transcriptional regulator of type I interferon (IFN)-dependent immune responses which plays a critical role in the innate immune response against DNA and RNA viruses. Regulates the transcription of ty
CD209	Protein Coding	CD209 Molecule	Entrez Gene Summary for CD209 Gene This gene encodes a transmembrane receptor and is often referred to as DC-SIGN because of its expression on the surface of dendritic cells and macrophages. The encoded protein is involved in the innate immune system and	UniProtKB/Swiss-Prot for CD209 GeneCD209_HUMAN,Q9NNX6Pathogen-recognition receptor expressed on the surface of immature dendritic cells (DCs) and involved in initiation of primary immune response. Thought to mediate the endocytosis of pathogens which are
CCL2	Protein Coding	C-C Motif Chemokine Ligand 2	Entrez Gene Summary for CCL2 Gene This gene is one of several cytokine genes clustered on the q-arm of chromosome 17. Chemokines are a superfamily of secreted proteins involved in immunoregulatory and inflammatory processes. The superfamily is divided int	UniProtKB/Swiss-Prot for CCL2 GeneCCL2_HUMAN,P13500Chemotactic factor that attracts monocytes and basophils but not neutrophils or eosinophils. Augments monocyte anti-tumor activity. Has been implicated in the pathogenesis of diseases characterized by mon
CCL5	Protein Coding	C-C Motif Chemokine Ligand 5	Entrez Gene Summary for CCL5 Gene This gene is one of several chemokine genes clustered on the q-arm of chromosome 17. Chemokines form a superfamily of secreted proteins involved in immunoregulatory and inflammatory processes. The superfamily is divided i	UniProtKB/Swiss-Prot for CCL5 GeneCCL5_HUMAN,P13501Chemoattractant for blood monocytes, memory T-helper cells and eosinophils. Causes the release of histamine from basophils and activates eosinophils. May activate several chemokine receptors including CCR
CXCL8	Protein Coding	C-X-C Motif Chemokine Ligand 8	Entrez Gene Summary for CXCL8 Gene The protein encoded by this gene is a member of the CXC chemokine family and is a major mediator of the inflammatory response. The encoded protein is secreted primarily by neutrophils, where it serves as a chemotactic fa	UniProtKB/Swiss-Prot for CXCL8 GeneIL8_HUMAN,P10145IL-8 is a chemotactic factor that attracts neutrophils, basophils, and T-cells, but not monocytes. It is also involved in neutrophil activation. It is released from several cell types in response to an in
MX1	Protein Coding	MX Dynamin Like GTPase 1	Entrez Gene Summary for MX1 Gene This gene encodes a guanosine triphosphate (GTP)-metabolizing protein that participates in the cellular antiviral response. The encoded protein is induced by type I and type II interferons and antagonizes the replication p	UniProtKB/Swiss-Prot for MX1 GeneMX1_HUMAN,P20591Interferon-induced dynamin-like GTPase with antiviral activity against a wide range of RNA viruses and some DNA viruses. Its target viruses include negative-stranded RNA viruses and HBV through binding and
DDX58	Protein Coding	DExD/H-Box Helicase 58	Entrez Gene Summary for DDX58 Gene DEAD box proteins, characterized by the conserved motif Asp-Glu-Ala-Asp (DEAD), are putative RNA helicases which are implicated in a number of cellular processes involving RNA binding and alteration of RNA secondary stru	UniProtKB/Swiss-Prot for DDX58 GeneDDX58_HUMAN,O95786Innate immune receptor which acts as a cytoplasmic sensor of viral nucleic acids and plays a major role in sensing viral infection and in the activation of a cascade of antiviral responses including the
IFNB1	Protein Coding	Interferon Beta 1	Entrez Gene Summary for IFNB1 Gene This gene encodes a cytokine that belongs to the interferon family of signaling proteins, which are released as part of the innate immune response to pathogens. The protein encoded by this gene belongs to the type I clas	UniProtKB/Swiss-Prot for IFNB1 GeneIFNB_HUMAN,P01574Has antiviral, antibacterial and anticancer activities.
TNF	Protein Coding	Tumor Necrosis Factor	Entrez Gene Summary for TNF Gene This gene encodes a multifunctional proinflammatory cytokine that belongs to the tumor necrosis factor (TNF) superfamily. This cytokine is mainly secreted by macrophages. It can bind to, and thus functions through its rece	UniProtKB/Swiss-Prot for TNF GeneTNFA_HUMAN,P01375Cytokine that binds to TNFRSF1A/TNFR1 and TNFRSF1B/TNFBR. It is mainly secreted by macrophages and can induce cell death of certain tumor cell lines. It is potent pyrogen causing fever by direct action or
CTSL	Protein Coding	Cathepsin L	Entrez Gene Summary for CTSL Gene The protein encoded by this gene is a lysosomal cysteine proteinase that plays a major role in intracellular protein catabolism. Its substrates include collagen and elastin, as well as alpha-1 protease inhibitor, a major	UniProtKB/Swiss-Prot for CTSL GeneCATL1_HUMAN,P07711Important for the overall degradation of proteins in lysosomes.
CTRL	Protein Coding	Chymotrypsin Like	Entrez Gene Summary for CTRL Gene This gene encodes a serine-type endopeptidase with chymotrypsin- and elastase-2-like activities. The gene encoding this zymogen is expressed specifically in the pancreas and likely functions as a digestive enzyme. [provid	Additional gene information for CTRL Gene HGNC(2524)Entrez Gene(1506)Ensembl(ENSG00000141086)OMIM(118888)UniProtKB(P40313) Search for CTRL at DataMedSearch for CTRL at HumanCyc
IL6	Protein Coding	Interleukin 6	Entrez Gene Summary for IL6 Gene This gene encodes a cytokine that functions in inflammation and the maturation of B cells. In addition, the encoded protein has been shown to be an endogenous pyrogen capable of inducing fever in people with autoimmune dis	UniProtKB/Swiss-Prot for IL6 GeneIL6_HUMAN,P05231Cytokine with a wide variety of biological functions. It is a potent inducer of the acute phase response. Plays an essential role in the final differentiation of B-cells into Ig-secreting cells Involved in
MBL2	Protein Coding	Mannose Binding Lectin 2	Entrez Gene Summary for MBL2 Gene This gene encodes the soluble mannose-binding lectin or mannose-binding protein found in serum. The protein encoded belongs to the collectin family and is an important element in the innate immune system. The protein reco	UniProtKB/Swiss-Prot for MBL2 GeneMBL2_HUMAN,P11226Calcium-dependent lectin involved in innate immune defense. Binds mannose, fucose and N-acetylglucosamine on different microorganisms and activates the lectin complement pathway. Binds to late apoptotic c
IL10	Protein Coding	Interleukin 10	Entrez Gene Summary for IL10 Gene The protein encoded by this gene is a cytokine produced primarily by monocytes and to a lesser extent by lymphocytes. This cytokine has pleiotropic effects in immunoregulation and inflammation. It down-regulates the expre	UniProtKB/Swiss-Prot for IL10 GeneIL10_HUMAN,P22301Inhibits the synthesis of a number of cytokines, including IFN-gamma, IL-2, IL-3, TNF and GM-CSF produced by activated macrophages and by helper T-cells.
IFNA1	Protein Coding	Interferon Alpha 1	Entrez Gene Summary for IFNA1 Gene The protein encoded by this gene is produced by macrophages and has antiviral activity. This gene is intronless and the encoded protein is secreted. [provided by RefSeq, Sep 2011]	UniProtKB/Swiss-Prot for IFNA1 GeneIFNA1_HUMAN,P01562Produced by macrophages, IFN-alpha have antiviral activities. Interferon stimulates the production of two enzymes: a protein kinase and an oligoadenylate synthetase.
TMPRSS2	Protein Coding	Transmembrane Serine Protease 2	Entrez Gene Summary for TMPRSS2 Gene This gene encodes a protein that belongs to the serine protease family. The encoded protein contains a type II transmembrane domain, a receptor class A domain, a scavenger receptor cysteine-rich domain and a protease d	UniProtKB/Swiss-Prot for TMPRSS2 GeneTMPS2_HUMAN,O15393Serine protease that proteolytically cleaves and activates the viral spike glycoproteins which facilitate virus-cell membrane fusions; spike proteins are synthesized and maintained in precursor interm
CXCL9	Protein Coding	C-X-C Motif Chemokine Ligand 9	Entrez Gene Summary for CXCL9 Gene This antimicrobial gene encodes a protein thought to be involved in T cell trafficking. The encoded protein binds to C-X-C motif chemokine 3 and is a chemoattractant for lymphocytes but not for neutrophils. [provided by	UniProtKB/Swiss-Prot for CXCL9 GeneCXCL9_HUMAN,Q07325Cytokine that affects the growth, movement, or activation state of cells that participate in immune and inflammatory response. Chemotactic for activated T-cells. Binds to CXCR3.
IFNG	Protein Coding	Interferon Gamma	Entrez Gene Summary for IFNG Gene This gene encodes a soluble cytokine that is a member of the type II interferon class. The encoded protein is secreted by cells of both the innate and adaptive immune systems. The active protein is a homodimer that binds	UniProtKB/Swiss-Prot for IFNG GeneIFNG_HUMAN,P01579Produced by lymphocytes activated by specific antigens or mitogens. IFN-gamma, in addition to having antiviral activity, has important immunoregulatory functions. It is a potent activator of macrophages,
STAT1	Protein Coding	Signal Transducer And Activator Of Transcription 1	Entrez Gene Summary for STAT1 Gene The protein encoded by this gene is a member of the STAT protein family. In response to cytokines and growth factors, STAT family members are phosphorylated by the receptor associated kinases, and then form homo- or hete	UniProtKB/Swiss-Prot for STAT1 GeneSTAT1_HUMAN,P42224Signal transducer and transcription activator that mediates cellular responses to interferons (IFNs), cytokine KITLG/SCF and other cytokines and other growth factors. Following type I IFN (IFN-alpha and
IL2	Protein Coding	Interleukin 2	Entrez Gene Summary for IL2 Gene The protein encoded by this gene is a secreted cytokine that is important for the proliferation of T and B lymphocytes. The receptor of this cytokine is a heterotrimeric protein complex whose gamma chain is also shared by	UniProtKB/Swiss-Prot for IL2 GeneIL2_HUMAN,P60568Produced by T-cells in response to antigenic or mitogenic stimulation, this protein is required for T-cell proliferation and other activities crucial to regulation of the immune response. Can stimulate B-ce
CD40LG	Protein Coding	CD40 Ligand	Entrez Gene Summary for CD40LG Gene The protein encoded by this gene is expressed on the surface of T cells. It regulates B cell function by engaging CD40 on the B cell surface. A defect in this gene results in an inability to undergo immunoglobulin class	UniProtKB/Swiss-Prot for CD40LG GeneCD40L_HUMAN,P29965Cytokine that binds to CD40/TNFRSF5 (PubMed:1280226). Costimulates T-cell proliferation and cytokine production. Its cross-linking on T-cells generates a costimulatory signal which enhances the product
FURIN	Protein Coding	Furin, Paired Basic Amino Acid Cleaving Enzyme	Entrez Gene Summary for FURIN Gene This gene encodes a member of the subtilisin-like proprotein convertase family, which includes proteases that process protein and peptide precursors trafficking through regulated or constitutive branches of the secretory	UniProtKB/Swiss-Prot for FURIN GeneFURIN_HUMAN,P09958Furin is likely to represent the ubiquitous endoprotease activity within constitutive secretory pathways and capable of cleavage at the RX(K/R)R consensus motif. (Microbial infection) Probably cleaves a
ICAM3	Protein Coding	Intercellular Adhesion Molecule 3	Entrez Gene Summary for ICAM3 Gene The protein encoded by this gene is a member of the intercellular adhesion molecule (ICAM) family. All ICAM proteins are type I transmembrane glycoproteins, contain 2-9 immunoglobulin-like C2-type domains, and bind to th	UniProtKB/Swiss-Prot for ICAM3 GeneICAM3_HUMAN,P32942ICAM proteins are ligands for the leukocyte adhesion protein LFA-1 (integrin alpha-L/beta-2) (PubMed:1448173). ICAM3 is also a ligand for integrin alpha-D/beta-2. In association with integrin alpha-L/be
CRP	Protein Coding	C-Reactive Protein	Entrez Gene Summary for CRP Gene The protein encoded by this gene belongs to the pentaxin family. It is involved in several host defense related functions based on its ability to recognize foreign pathogens and damaged cells of the host and to initiate th	UniProtKB/Swiss-Prot for CRP GeneCRP_HUMAN,P02741Displays several functions associated with host defense: it promotes agglutination, bacterial capsular swelling, phagocytosis and complement fixation through its calcium-dependent binding to phosphorylcholi
TMPRSS11D	Protein Coding	Transmembrane Serine Protease 11D	Entrez Gene Summary for TMPRSS11D Gene This gene encodes a trypsin-like serine protease released from the submucosal serous glands onto mucous membrane. It is a type II integral membrane protein and has 29-38% identity in the sequence of the catalytic reg	UniProtKB/Swiss-Prot for TMPRSS11D GeneTM11D_HUMAN,O60235May play some biological role in the host defense system on the mucous membrane independently of or in cooperation with other substances in airway mucous or bronchial secretions. Plays a role in the
GPT	Protein Coding	Glutamic--Pyruvic Transaminase	Entrez Gene Summary for GPT Gene This gene encodes cytosolic alanine aminotransaminase 1 (ALT1); also known as glutamate-pyruvate transaminase 1. This enzyme catalyzes the reversible transamination between alanine and 2-oxoglutarate to generate pyruvate a	UniProtKB/Swiss-Prot for GPT GeneALAT1_HUMAN,P24298Catalyzes the reversible transamination between alanine and 2-oxoglutarate to form pyruvate and glutamate. Participates in cellular nitrogen metabolism and also in liver gluconeogenesis starting with prec
CCR5	Protein Coding	C-C Motif Chemokine Receptor 5 (Gene/Pseudogene)	Entrez Gene Summary for CCR5 Gene This gene encodes a member of the beta chemokine receptor family, which is predicted to be a seven transmembrane protein similar to G protein-coupled receptors. This protein is expressed by T cells and macrophages, and is	UniProtKB/Swiss-Prot for CCR5 GeneCCR5_HUMAN,P51681Receptor for a number of inflammatory CC-chemokines including CCL3/MIP-1-alpha, CCL4/MIP-1-beta and RANTES and subsequently transduces a signal by increasing the intracellular calcium ion level. May play
AAK1	Protein Coding	AP2 Associated Kinase 1	Entrez Gene Summary for AAK1 Gene Adaptor-related protein complex 2 (AP-2 complexes) functions during receptor-mediated endocytosis to trigger clathrin assembly, interact with membrane-bound receptors, and recruit encodytic accessory factors. This gene en	UniProtKB/Swiss-Prot for AAK1 GeneAAK1_HUMAN,Q2M2I8Regulates clathrin-mediated endocytosis by phosphorylating the AP2M1/mu2 subunit of the adaptor protein complex 2 (AP-2) which ensures high affinity binding of AP-2 to cargo membrane proteins during the i
GAK	Protein Coding	Cyclin G Associated Kinase	Entrez Gene Summary for GAK Gene In all eukaryotes, the cell cycle is governed by cyclin-dependent protein kinases (CDKs), whose activities are regulated by cyclins and CDK inhibitors in a diverse array of mechanisms that involve the control of phosphoryl	UniProtKB/Swiss-Prot for GAK GeneGAK_HUMAN,O14976Associates with cyclin G and CDK5. Seems to act as an auxilin homolog that is involved in the uncoating of clathrin-coated vesicles by Hsc70 in non-neuronal cells. Expression oscillates slightly during the
JAK1	Protein Coding	Janus Kinase 1	Entrez Gene Summary for JAK1 Gene This gene encodes a membrane protein that is a member of a class of protein-tyrosine kinases (PTK) characterized by the presence of a second phosphotransferase-related domain immediately N-terminal to the PTK domain. The	UniProtKB/Swiss-Prot for JAK1 GeneJAK1_HUMAN,P23458Tyrosine kinase of the non-receptor type, involved in the IFN-alpha/beta/gamma signal pathway (PubMed:7615558). Kinase partner for the interleukin (IL)-2 receptor (PubMed:11909529).
