# Supplementary material for: Network Bioinformatics Analysis Provides Insight into Drug Repurposing for COVID-2019
Source: Preprints.org preprint supplement (doi:10.20944/preprints202003.0286.v1), 2020-03-18
Supplement: Supplementary file 2 [file Supp_table_2_2019-nCoV_enriched_pathways.xlsx]

## Sheet: 2019ncov_autoseed_core_pathways
ID	Description
hsa04061	Viral protein interaction with cytokine and cytokine receptor
hsa04060	Cytokine-cytokine receptor interaction
hsa04062	Chemokine signaling pathway
hsa04620	Toll-like receptor signaling pathway
hsa04623	Cytosolic DNA-sensing pathway
hsa04612	Antigen processing and presentation
hsa04657	IL-17 signaling pathway
hsa04622	RIG-I-like receptor signaling pathway
hsa04625	C-type lectin receptor signaling pathway
hsa04621	NOD-like receptor signaling pathway
hsa04659	Th17 cell differentiation
hsa04672	Intestinal immune network for IgA production
hsa04630	JAK-STAT signaling pathway
hsa04640	Hematopoietic cell lineage
hsa04660	T cell receptor signaling pathway
hsa04940	Type I diabetes mellitus
hsa04217	Necroptosis
hsa04650	Natural killer cell mediated cytotoxicity
hsa04658	Th1 and Th2 cell differentiation
hsa04064	NF-kappa B signaling pathway
hsa04145	Phagosome
hsa04668	TNF signaling pathway
hsa04514	Cell adhesion molecules (CAMs)
hsa04933	AGE-RAGE signaling pathway in diabetic complications
