# Supplementary material for: Network Bioinformatics Analysis Provides Insight into Drug Repurposing for COVID-2019
Source: Preprints.org preprint supplement (doi:10.20944/preprints202003.0286.v1), 2020-03-18
Supplement: Supplementary file 3 [file Supp_table_3_78_drugs.xlsx]

## Sheet: Sheet1
Num	DrugbankID	Drugname	Type	Group	Description	Score	Chinese name
1	DB00852	Pseudoephedrine	SmallMoleculeDrug	approved	An alpha- and beta-adrenergic agonist that may also enhance release of norepinephrine It has been used in the treatment of several disorders including asthma heart failure rhinitis and urinary incontinence and for its central nervous system stimulatory ef	20	伪麻黄碱
2	DB05767	Andrographolide	SmallMoleculeDrug	investigational	HMPL-004 is a botanical product extracted from a herb that occurs naturally in China The herb has an extensive history of use in TCM for the treatment of upper respiratory tract infections and other inflammatory and infectious diseases	20	穿心莲内酯
3	DB05513	Atiprimod	SmallMoleculeDrug	investigational	Not Available	20	阿替莫德
4	DB05676	Apremilast	SmallMoleculeDrug	approved; investigational	Apremilast is a novel orally available small molecule inhibitor of type-4 cyclic nucleotide phosphodiesterase PDE-4 It is indicated in the treatment of active psoriatic arthritis in adults approved by the FDA in March 2014 and moderate to severe plaque ps	20	阿普斯特
5	DB09221	Polaprezinc	SmallMoleculeDrug	experimental	Polaprezinc is a chelated form of zinc and L-carnosine It is a zinc-related medicine approved for the first time in Japan which has been clinically used to treat gastric ulcers [5] It was determined that polaprezinc may be effective in pressure ulcer trea	20	聚普瑞锌/L-肌肽锌
6	DB11967	Binimetinib	SmallMoleculeDrug	approved; investigational	Binimetinib also known as Mektovi is a potent is a potent and selective oral mitogen-activated protein kinase 1/2 MEK 1/2 inhibitor which is combined with Encorafenib [4][8]On June 27 2018 the Food and Drug Administration approved the combination of Encor	20	比尼替尼
7	DB12140	Dilmapimod	SmallMoleculeDrug	investigational	Dilmapimod has been used in trials studying the treatment and diagnostic of Nerve Trauma Inflammation Pain Neuropathic Arthritis Rheumatoid and Coronary Heart Disease among others Dilmapimod SB-681323 is a p38 MAP-kinase inhibitor that has potential uses	20	地尔吡莫德
8	DB05017	YSIL6	SmallMoleculeDrug	investigational	YSIL6 is a small-molecule drug in development for the treatment of inflammatory diseases including rheumatoid arthritis and psoriasis The molecule works by inhibiting TNF-alpha and IL-6 production in T-cells and macrophages and by inhibiting T-cell prolif	20	YSIL6
9	DB05470	VX-702	SmallMoleculeDrug	investigational	VX-702 is a small molecule investigational oral anti-cytokine therapy for treatment of inflammatory diseases specifically rheumatoid arthritis RA It acts as a p38 MAP kinase inhibitor In the future VX-702 may be investigated for combination with methotrex	20	VX-702
10	DB05744	CRx-139	SmallMoleculeDrug	investigational	CRx-139 is an oral synergistic combination drug candidates with novel mechanisms of action targeting multiple biological pathways simultaneously It is a dissociated steroid designed to enhance the immuno-modulatory activity of a low-dose glucocorticoid st	20	CRx-139
11	DB06083	Tapinarof	SmallMoleculeDrug	investigational	Tapinarof is targeted as a topical cream treatment for psoriasis a chronic autoimmune skin disease	19	苯烯莫德
12	DB00005	Etanercept	BiotechDrug	Not Available	Dimeric fusion protein consisting of the extracellular ligand-binding portion of the human 75 kilodalton p75 tumor necrosis factor receptor TNFR linked to the Fc portion of human IgG1 The Fc component of etanercept contains the CH2 domain the CH3 domain a	16	依那西普
13	DB00051	Adalimumab	BiotechDrug	Not Available	Adalimumab is a subcutaneously administered biological disease modifier for the treatment of rheumatoid arthritis and other chronic debilitating diseases mediated by tumor necrosis factor [2] [3] It was originally launched by Abbvie in the US and approved	16	阿达木单抗
14	DB00065	Infliximab	BiotechDrug	Not Available	Infliximab is a tumor necrosis factor TNF-alpha or TNF-锟斤拷 blocker and a chimeric monoclonal IgG1 antibody composed of human constant 75% and murine variable 25% regions [3] Infliximab is produced by a recombinant cell line cultured by continuous perfusion	16	英夫利昔单抗
15	DB00608	Chloroquine	SmallMoleculeDrug	approved; investigational; vet_approved	The prototypical antimalarial agent with a mechanism that is not well understood It has also been used to treat rheumatoid arthritis systemic lupus erythematosus and in the systemic therapy of amebic liver abscesses	16	氯喹
16	DB00668	Epinephrine	SmallMoleculeDrug	approved; vet_approved	Epinephrine also known as adrenaline is a hormone and neurotransmitter and produced by the adrenal glands that can also be used as a drug due to its various important functions Though it has long been used in the treatment of hypersensitivity reactions ep	16	肾上腺素
17	DB01041	Thalidomide	SmallMoleculeDrug	approved; investigational; withdrawn	A piperidinyl isoindole originally introduced as a non-barbiturate hypnotic but withdrawn from the market due to teratogenic effects It has been reintroduced and used for a number of immunological and inflammatory disorders Thalidomide displays immunosupp	16	沙利度胺
18	DB01407	Clenbuterol	SmallMoleculeDrug	approved; investigational; vet_approved	A substituted phenylaminoethanol that has beta-2 adrenomimetic properties at very low doses It is used as a bronchodilator in asthma	16	克仑特罗
19	DB01411	Pranlukast	SmallMoleculeDrug	investigational	Pranlukast is a cysteinyl leukotriene receptor-1 antagonist It antagonizes or reduces bronchospasm caused principally in asthmatics by an allergic reaction to accidentally or inadvertently encountered allergens	16	普仑司特
20	DB01427	Amrinone	SmallMoleculeDrug	approved	Amrinone or inamrinone is a type 3 pyridine phosphodiesterase inhibitor It is used in the treatment of congestive heart failure	16	氨力农
21	DB04956	Afelimomab	BiotechDrug	Not Available	Afelimomab also known as Fab 2 or MAK 195F is an anti-TNF-锟斤拷 monoclonal antibody Administration of 195F reduces the concentration of interleukin-6 in patients with sepsis	16	阿非莫单抗
22	DB05207	SD118	SmallMoleculeDrug	investigational	SD118 was previously under investigation in Japan for a different indication and now following re-profiling and evaluation in experimental animal models has demonstrated its potential as a new oral therapy for neuropathic pain	16	SD118
23	DB05218	PN0621	BiotechDrug	Not Available	PN0621 is an anti-TNF domain antibody dAb based therapeutic It targets tumour necrosis factor TNF to treat auto-immune inflammatory diseases such as rheumatoid arthritis It is being developed by Peptech	16	PN0621
24	DB05303	OMS-103HP	SmallMoleculeDrug	investigational	OMS103HP is the first drug being developed to improve joint function following arthroscopic surgery one of the most common procedures performed today by orthopedic surgeons	16	OMS-103HP
25	DB05412	Talmapimod	SmallMoleculeDrug	investigational	Talmapimod is the first-generation oral p38 MAP kinase inhibitor developed by Scios It has shown to be effective to cure inflammatory diseases such as Rheumatoid Arthritis	16	6-氯-5-[[(2R,5S)-4-[(4-氟苯基)甲基]-2,5-二甲基-1-哌嗪基]甲酰基]-N,N,1-三甲基-ALPHA-氧代-1H-吲哚-3-乙酰胺
26	DB05758	CYT007-TNFQb	BiotechDrug	Not Available	CYT007-TNFQb is an active immunization therapy that aims atproviding a novel treatment to people suffering from RA or psoriasis The vaccine should allow for administration of lowamounts of drug to individual patients in the microgram range and for conveni	16	CYT007-TNFQb
27	DB05879	AME-527	BiotechDrug	Not Available	AME-527 is a humanized monoclonal antibody that recognizes human TNF-alpha hTNF-alpha with high affinity and specificity AME-527 was generated by protein engineering and identified from a library of antibody variants based on its improved binding properti	16	AME-527
28	DB05968	PR-104	SmallMoleculeDrug	investigational	Not Available	16	PR-104
29	DB05992	Plinabulin	SmallMoleculeDrug	investigational	Not Available	16	滨铂
30	DB06444	Dexanabinol	SmallMoleculeDrug	investigational	Not Available	16	地那滨醇
31	DB06495	Onercept	BiotechDrug	Not Available	Not Available	16	奥那西普
32	DB06674	Golimumab	BiotechDrug	Not Available	Golimumab is a human IgG1<U+049B> monoclonal antibody derived from immunizing genetically engineered mice with human TNF锟斤拷 Golimumab binds and inhibits soluble and transmembrane human TNF锟斤拷 Increased TNF锟斤拷 is associated with chronic inflammation Thus goli	16	戈利木单抗
33	DB08910	Pomalidomide	SmallMoleculeDrug	approved	Pomalidomide an analogue of thalidomide is an immunomodulatory antineoplastic agent FDA approved on February 8 2013	16	泊马度胺
34	DB01404	Ginseng	SmallMoleculeDrug	approved; investigational; nutraceutical	Ginseng is promoted as an adaptogen a product that increases the body's resistance to stress one which can to a certain extent be supported with reference to its anticarcinogenic and antioxidant properties Ginseng is also known to contain phytoestrogens	13	参
35	DB09036	Siltuximab	BiotechDrug	Not Available	Siltuximab is a chimeric human-mouse monoclonal immunoglobulin G1-kappa antibody produced in a Chinese hamster ovary CHO cell line by recombinant DNA technology Siltuximab prevents the binding of IL-6 to soluble and membrane-bound IL-6 receptors by formin	13	西妥昔单抗
36	DB01250	Olsalazine	SmallMoleculeDrug	approved	Olsalazine is an anti-inflammatory drug used in the treatment of Inflammatory Bowel Disease and Ulcerative Colitis Olsalazine is a derivative of salicylic acid Inactive by itself it is a prodrug it is converted by the bacteria in the colon to mesalamine M	10	奥沙拉嗪
37	DB05110	VIR201	BiotechDrug	Not Available	is an experimental therapeutic vaccine currently in clinical trial The aim of therapeutic vaccines is to augment the body's immune response to HIV and to delay or prevent progression to AIDS	10	VIR201
38	DB05111	Fontolizumab	BiotechDrug	Not Available	Fontolizumab marketed under the trade name HuZAF<U+2122> is a humanized monoclonal antibody which is used as an immunosuppressive drug to treat Crohn's disease	10	曲妥珠单抗
39	DB12698	Ibalizumab	BiotechDrug	Not Available	Ibalizumab also known as ibalizumab-uiyk and formerly known as TNX-355 is a monoclonal antibody that binds to CD4 receptors on the surface of CD4-positive cells preventing HIV particle entry into the lymphocytes It is an advanced and current antibody in d	10	伊巴珠单抗
40	DB05304	WX-G250	SmallMoleculeDrug	investigational	WX-G250 is a monoclonal chimeric mouse/human antibody directed against carbonic anhydrase IX an antigen expressed in 95% of clear cell renal cell carcinomas RCC	9	WX-G250
41	DB05434	ABT-510	SmallMoleculeDrug	investigational	ABT-510 is peptide mimetics of thrombospondin-1 TSP-1 block angiogenesis in vitro and in vivo and slow tumor growth It is developed by Abbott Laboratories for the treatment of Solid Tumors Lymphoma and Melanoma	9	ABT-510
42	DB05484	MDX-018	SmallMoleculeDrug	investigational	MDX-018 also known as HuMax-Inflam is a fully human antibody that is directed to IL-8 interleukin-8 and may have potential application in oncology and inflammation Trials will initially focus on studies to treat glioblastoma a cancer of the central nervou	9	MDX-018
43	DB01327	Cefazolin	SmallMoleculeDrug	approved	A semisynthetic cephalosporin analog with broad-spectrum antibiotic action due to inhibition of bacterial cell wall synthesis It attains high serum levels and is excreted quickly via the urine	9	头孢唑林
44	DB05855	Rivanicline	SmallMoleculeDrug	investigational	Rivanicline TC-2403 RJR-2403 E-metanicotine is a drug which acts as a partial agonist at neural nicotinic acetylcholine receptors It is subtype-selective binding primarily to the 锟斤拷4锟斤拷2 subtype It has nootropic effects and was originally developed as a po	9	利万昔林
45	DB06116	Eldelumab	SmallMoleculeDrug	investigational	MDX-1100 a fully human antibody that targets IP10 also known as CXCL10 a chemokine expressed in association with multiple inflammatory disease indications such as rheumatoid arthritis inflammatory bowel disease and multiple sclerosis	8	Eldelumab
46	DB01055	Mimosine	SmallMoleculeDrug	experimental	3-Hydroxy-4-oxo-14H-pyridinealanine An antineoplastic alanine-substituted pyridine derivative isolated from Leucena glauca [PubChem]	7	含羞草碱
47	DB01406	Danazol	SmallMoleculeDrug	approved	A synthetic steroid with antigonadotropic and anti-estrogenic activities that acts as an anterior pituitary suppressant by inhibiting the pituitary output of gonadotropins It possesses some androgenic properties Danazol has been used in the treatment of e	7	达那唑
48	DB06241	Clenoliximab	BiotechDrug	Not Available	Clenoliximab is a monoclonal antibody against CD4 It acts as an immunomodulator and has been investigated for the treatment of rheumatoid arthritis The drug is a chimeric antibody from Macaca irus and Homo sapiens	7	氯诺昔单抗
49	DB05771	LLL-3348	SmallMoleculeDrug	investigational	The botanical drug product LLL-3348 is a once-daily oral formulation for treatment of chronic stable plaque type psoriasis	6	LLL-3348
50	DB01048	Abacavir	SmallMoleculeDrug	approved; investigational	Abacavir ABC is a powerful nucleoside analog reverse transcriptase inhibitor NRTI used to treat HIV and AIDS Chemically it is a synthetic carbocyclic nucleoside and is the enantiomer with 1S 4R absolute configuration on the cyclopentene ring In vivo abaca	5	阿巴卡韦
51	DB02375	Myricetin	SmallMoleculeDrug	experimental	Not Available	5	杨梅素
52	DB04464	N-Formylmethionine	SmallMoleculeDrug	experimental	Effective in the initiation of protein synthesis The initiating methionine residue enters the ribosome as N-formylmethionyl tRNA This process occurs in Escherichia coli and other bacteria as well as in the mitochondria of eucaryotic cells [PubChem]	5	N-甲酰基蛋氨酸
53	DB05078	AER001	SmallMoleculeDrug	investigational	AER001 an IL4/13 receptor antagonist for severe asthma and eczema currently in Phase 2 studies	5	AER001
54	DB06475	Ruplizumab	BiotechDrug	Not Available	Ruplizumab is a humanized monoclonal antibody used as an immunosuppressive drug and is a component of Antova	5	鲁普单抗
55	DB06822	Tinzaparin	SmallMoleculeDrug	approved	Tinzaparin is a low molecular weight heparin LMWH produced by enzymatic depolymerization of unfractionated heparin from porcine intestinal mucosa It is a heterogeneous mixture of with an average molecular weight between 5500 and 7500 daltons Tinzaparin is	5	依诺肝素
56	DB08877	Ruxolitinib	SmallMoleculeDrug	approved	Ruxolitinib is a janus-associated kinase inhibitor indicated to treat bone marrow cancer specifically intermediate or high-risk myelofibrosis FDA approved on November 16 2011	5	鲁索替尼
57	DB08895	Tofacitinib	SmallMoleculeDrug	approved; investigational	Tofacitinib is an inhibitor of Janus kinases a group of intracellular enzymes involved in signalling pathways that affect hematopoiesis and immune cell function It is approved by the FDA for treatment of moderate to severe rheumatoid arthritis that respon	5	托法替尼
58	DB11817	Baricitinib	SmallMoleculeDrug	approved; investigational	Baricitinib is a selective and reversible Janus kinase 1 JAK1 and 2 JAK2 inhibitor Janus kinases belong to the tyrosine protein kinase family and play an important role in the proinflammatory pathway signalling that is frequently over-activated in autoimm	5	巴瑞替尼
59	DB12159	Dupilumab	BiotechDrug	Not Available	Dupilumab injection to treat adults with moderate-to-severe eczema atopic dermatitis Dupilumab is intended for patients whose eczema is not controlled adequately by topical therapies or those for whom topical therapies are not advisable Dupilumab can be u	5	鲁普单抗
60	DB00452	Framycetin	SmallMoleculeDrug	approved	A component of neomycin that is produced by Streptomyces fradiae On hydrolysis it yields neamine and neobiosamine B From Merck Index 11th ed	4	曲霉菌素
61	DB05364	ROX-888	SmallMoleculeDrug	investigational	ROX-888 is ROXRO's lead compound which is currently in Phase 3 trials for the treatment of acute pain including post-operative pain	4	ROX-888
62	DB05429	CAT-213	BiotechDrug	Not Available	CAT-213 is a fully human anti-eotaxin monoclonal antibody with potential in the treatment of allergic disorders has moved into pre-clinical development It is developed by MedImmune for the treatment of Allergic Rhinitis	4	CAT-213
63	DB05501	AMD-070	SmallMoleculeDrug	investigational	AMD-070 is a small molecule drug candidate that belongs to a new investigational class of anti-HIV drugs known as entry fusion inhibitors Currently there is only one FDA-approved entry inhibitor enfuvirtide Fuzeon that is available for the treatment of HI	4	AMD-070
64	DB06809	Plerixafor	SmallMoleculeDrug	approved	Plerixafor is a hematopoietic stem cell mobilizer It is used to stimulate the release of stem cells from the bone marrow into the blood in patients with non-Hodgkin lymphoma and multiple myeloma for the purpose of stimulating the immune system These stem	4	培来沙福
65	DB01009	Ketoprofen	SmallMoleculeDrug	approved; vet_approved	Ketoprofen a propionic acid derivative is a nonsteroidal anti-inflammatory agent NSAIA with analgesic and antipyretic properties	3	酮洛芬
66	DB04835	Maraviroc	SmallMoleculeDrug	approved; investigational	Maraviroc brand-named Selzentry or Celsentri outside the US is a chemokine receptor antagonist drug developed by the drug company Pfizer that is designed to act against HIV by interfering with the interaction between HIV and CCR5 It was originally labelle	3	马拉维若
67	DB05130	INCB3284	SmallMoleculeDrug	investigational	INCB3284 is a CCR2 antagonist for Inflammation-driven Diseases	3	INCB3284
68	DB05159	CCX915	SmallMoleculeDrug	investigational	CCX915 is developed by ChemoCentryx which targets the chemokine receptor CCR2 and is in phase 1 of clinical trial for the treatment of Multiple Sclerosis and Neurologic Disorders The CCR2 receptor is thought to be of central importance to inflammatory dis	3	研究用于/治疗多发性硬化症和神经系统疾病
69	DB06652	Vicriviroc	SmallMoleculeDrug	investigational	Vicriviroc previously named SCH 417690 and SCH-D is a pyrimidine currently undergoing clinical trials as a CCR5 entry inhibitor of HIV-1 It was developed by the pharmaceutical company Schering-Plough	3	Vicriviroc
70	DB09029	Secukinumab	BiotechDrug	Not Available	Secukinumab Cosentyx is a human monoclonal antibody designed for the treatment of uveitis rheumatoid arthritis ankylosing spondylitis and psoriasis Secukinumab is an interleukin-17A IL-17A inhibitor marketed by Novartis IL-17 is a group of proinflammatory	3	苏金单抗
71	DB11569	Ixekizumab	BiotechDrug	Not Available	Ixekizumab is a humanized immunoglobulin G subclass 4 IgG4 monoclonal antibody mAb against interleukin-17A IL-17A and prevents it from interacting with the IL-17A receptor As IL-17A is a pro-inflammatory cytokine involved in inflammation and immune respon	3	伊克珠单抗
72	DB12520	Plozalizumab	BiotechDrug	Not Available	Plozalizumab has been investigated for the treatment of Atherosclerosis Plozalizumab a novel humanized monoclonal antibody specifically targets CCR2 chemokine receptors found on the surface of certain white blood cells including macrophages and monocytes	3	帕洛珠单抗
73	DB12960	INCB-9471	SmallMoleculeDrug	investigational	INCB-9471 is a novel orally available CCR5 antagonist that is part of a new class of drugs to treat HIV/AIDS It is a potent selective inhibitor of the HIV-1 virus	3	INCB-9471
74	DB00091	Ciclosporin	SmallMoleculeDrug	approved; investigational; vet_approved	Cyclosporine is a lipophilic cyclic polypeptide formed by 11 amino acids that presents powerful immunosuppressive and immunomodulatory properties[12] It is isolated from the fungus Beauveria nivea and it was first formulated as an injectable ethanolic sol	1	环孢菌素
75	DB00172	Proline	SmallMoleculeDrug	approved; nutraceutical	L-Proline is one of the twenty amino acids used in living organisms as the building blocks of proteins Proline is sometimes called an imino acid although the IUPAC definition of an imine requires a carbon-nitrogen double bond Proline is a non-essential am	1	脯氨酸
76	DB04216	Quercetin	SmallMoleculeDrug	experimental; investigational	A flavonol widely distributed in plants It is an antioxidant like many other phenolic heterocyclic compounds Glycosylated forms include RUTIN and quercetrin [PubChem]	1	槲皮素
77	DB06616	Bosutinib	SmallMoleculeDrug	approved	Bosutinib is a Bcr-Abl kinase inhibitor for the treatment of Philadelphia chromosome-positive Ph+ chronic myelogenous leukemia CML Compared to other tyrosine kinase inhibitors it has a more favourable hematologic toxicity profile FDA approved on September	1	博舒替尼
78	DB11638	Artenimol	SmallMoleculeDrug	experimental; investigational	Artenimol is an artemisinin derivative and antimalarial agent used in the treatment of uncomplicated Plasmodium falciparum infections [Label] It was first authorized for market by the European Medicines Agency in October 2011 in combination with Piperaqui	1	蒿甲醚
